# Supplementary material for: Characteristics and usefulness of transabdominal ultrasonography in immune-mediated colitis
Source: PubMed Central journal article supplement — Intest Res. 2022 Jul 22;21(1):126–36. doi: 10.5217/ir.2021.00166 (PMC9911272; doi:10.5217/ir.2021.00166), 2022-07-22
Supplement: ir-2021-00166-Supplementary-Fig-1.pdf [file ir-2021-00166-Supplementary-Fig-1.pdf]

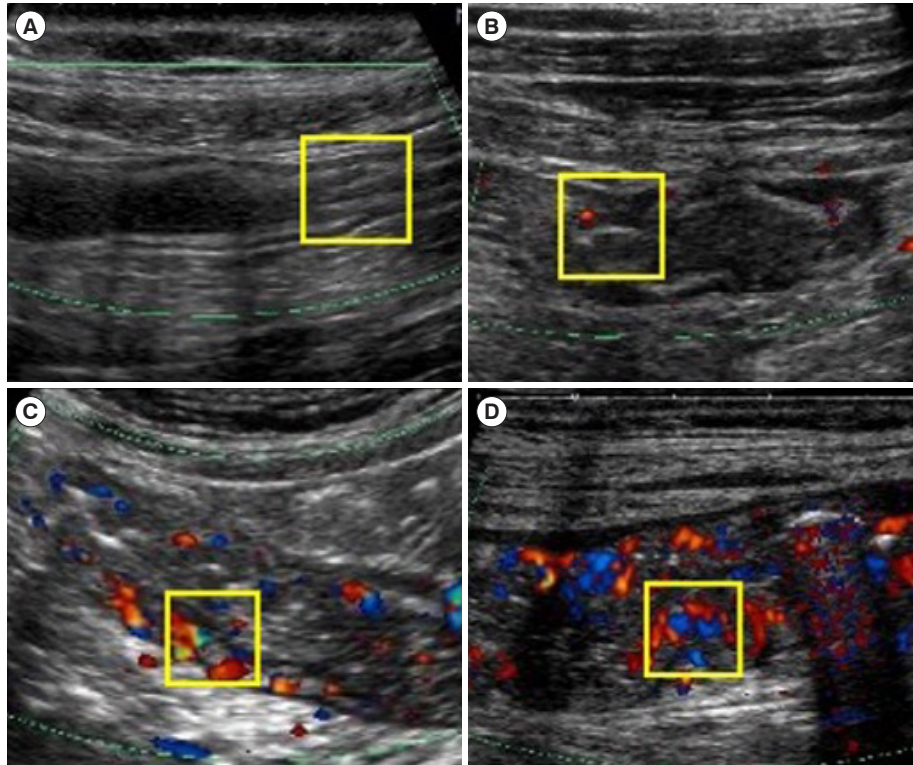

**Supplementary Fig. 1.** Grading system of color Doppler signal (CDS). The semi-quantitative grading system of the CDSs in the intestinal wall. The amount of blood flow signal within a 10 × 10 mm square region of interest was evaluated. (A) Grade 0: no CDS. (B) Grade 1: few spotty signals. (C) Grade 2: confluent vessel signals in less than half of the area of the bowel wall. (D) Grade 3: confluent vessel signals in more than half of the area of the bowel wall.
