# Supplementary material for: Characteristics and usefulness of transabdominal ultrasonography in immune-mediated colitis
Source: PubMed Central journal article supplement — Intest Res. 2022 Jul 22;21(1):126–36. doi: 10.5217/ir.2021.00166 (PMC9911272; doi:10.5217/ir.2021.00166), 2022-07-22
Supplement: ir-2021-00166-Supplementary-Fig-2.pdf [file ir-2021-00166-Supplementary-Fig-2.pdf]

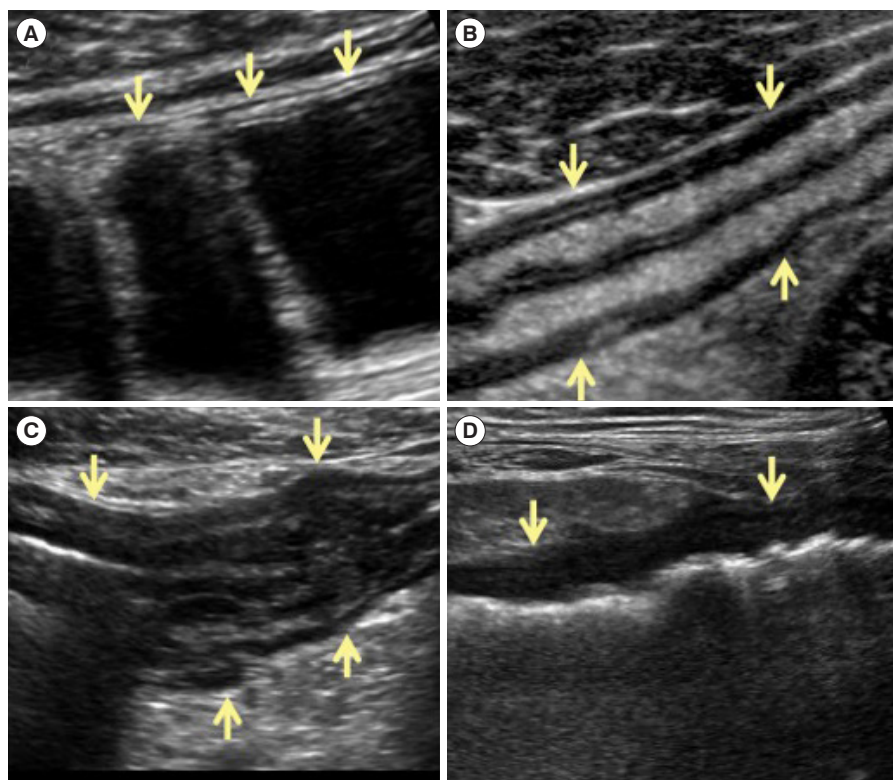

**Supplementary Fig. 2.** Grading system of transabdominal ultrasonography (US) grades. (A) US grade 1: normal thickness of the colonic wall (arrows). (B) US grade 2: thickened mucosa and submucosa without hypoechoic change of the submucosa (arrows). (C) US grade 3: bowel wall thickness with loss of stratification (arrows). (D) US grade 4: bowel wall thickness with loss of stratification and irregular mucosa or hyperechogenic shallow concavity in the mucosa, which suggests ulceration (arrows).
