# Supplementary material for: Characteristics and usefulness of transabdominal ultrasonography in immune-mediated colitis
Source: PubMed Central journal article supplement — Intest Res. 2022 Jul 22;21(1):126–36. doi: 10.5217/ir.2021.00166 (PMC9911272; doi:10.5217/ir.2021.00166), 2022-07-22
Supplement: ir-2021-00166-Supplementary-Fig-3.pdf [file ir-2021-00166-Supplementary-Fig-3.pdf]

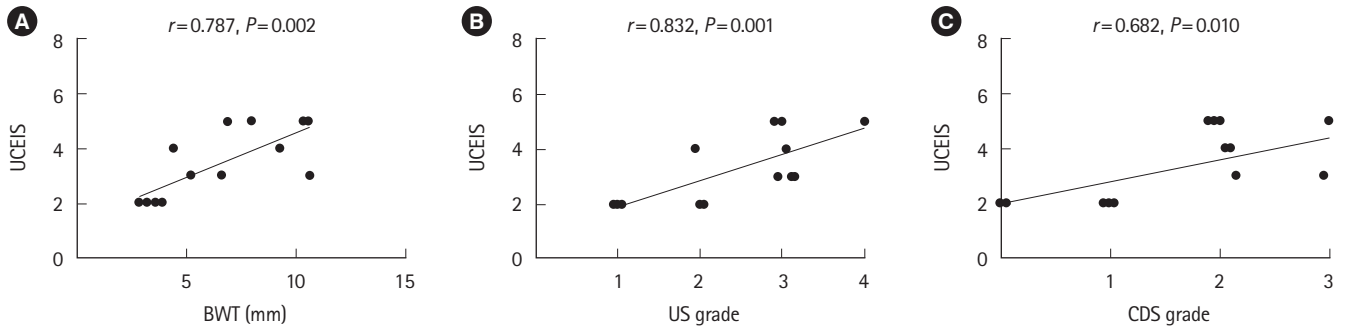

**Supplementary Fig. 3.** Correlation between BWT, US grade, CDS grade, and UCEIS at the most severely affected sites in the colon, excluding the rectum. (A) A strong correlation was found between BWT and UCEIS, (B) US grade and UCEIS, and (C) a moderate correlation was found between CDS grade and UCEIS. BWT, bowel wall thickness; US, ultrasonography; CDS, color Doppler signal; UCEIS, Ulcerative Colitis Endoscopic Index of Severity.
