# Supplementary material for: Characteristics and usefulness of transabdominal ultrasonography in immune-mediated colitis
Source: PubMed Central journal article supplement — Intest Res. 2022 Jul 22;21(1):126–36. doi: 10.5217/ir.2021.00166 (PMC9911272; doi:10.5217/ir.2021.00166), 2022-07-22
Supplement: ir-2021-00166-Supplementary-Table-1.pdf [file ir-2021-00166-Supplementary-Table-1.pdf]

**Supplementary Table 1.** Ulcerative Colitis Endoscopic Index of Severity

| Descriptor (score most severe lesions) | Likert scale anchor points     | Definition                                                                                                                                                      |
|----------------------------------------|--------------------------------|-----------------------------------------------------------------------------------------------------------------------------------------------------------------|
| Vascular pattern                       | Normal (0)                     | Normal vascular pattern with arborization of capillaries clearly defined or with blurring or patchy loss of capillary margins                                   |
|                                        | Patchy obliteration (1)        | Patchy obliteration of vascular pattern                                                                                                                         |
|                                        | Obliterated (2)                | Complete obliteration of vascular pattern                                                                                                                       |
| Bleeding                               | None (0)                       | No visible blood                                                                                                                                                |
|                                        | Mucosal (1)                    | Some spots or streaks of coagulated blood on the surface of the mucosa ahead of the scope can be washed away                                                    |
|                                        | Luminal mild (2)               | Some free liquid blood in the lumen                                                                                                                             |
|                                        | Luminal moderate or severe (3) | Frank blood in the lumen ahead of the endoscope or visible oozing from the mucosa after washing intraluminal blood, or visible oozing from a hemorrhagic mucosa |
| Erosions and ulcers                    | None (0)                       | Normal mucosa, no visible erosions or ulcers                                                                                                                    |
|                                        | Erosions (1)                   | Tiny (5 mm) defects in the mucosa of white or yellow color with a flat edge                                                                                     |
|                                        | Superficial ulcer (2)          | Larger (>5 mm) defects in the mucosa, which are discrete fibrin-covered ulcers when compared with erosions but remain superficial                               |
|                                        | Deep ulcer (3)                 | Deeper excavated defects in the mucosa with a slightly raised edge                                                                                              |

Each item was subjected to evaluation, with a total score ranging from 0 to 8 points. A score of 0 points was given in case of endoscopic remission, and the score was reduced by 2 or more points in case of endoscopic improvement.
