# Supplementary material for: Characteristics and usefulness of transabdominal ultrasonography in immune-mediated colitis
Source: PubMed Central journal article supplement — Intest Res. 2022 Jul 22;21(1):126–36. doi: 10.5217/ir.2021.00166 (PMC9911272; doi:10.5217/ir.2021.00166), 2022-07-22
Supplement: ir-2021-00166-Supplementary-Table-2.pdf [file ir-2021-00166-Supplementary-Table-2.pdf]

**Supplementary Table 2.** CTCAE Grade of Colitis Version 5.0

| Grade | Definition                                                                         |
|-------|------------------------------------------------------------------------------------|
| 1     | Asymptomatic; clinical or diagnostic observations only; intervention not indicated |
| 2     | Abdominal pain; mucus or blood in stool                                            |
| 3     | Severe abdominal pain; peritoneal signs                                            |
| 4     | Life-threatening consequences; urgent intervention indicated                       |
| 4     | Death                                                                              |

CTCAE, Common Terminology Criteria of Adverse Events.
